# Supplementary material for: Genome-Wide Association Study Reveals Candidate Genes for Flowering Time Variation in Common Bean (Phaseolus vulgaris L.)
Source: PubMed Central journal article supplement (PMC6689981; doi:10.3389/fpls.2019.00962), 2019-07-24
Supplement: Data_Sheet_1.pdf [file Data_Sheet_1.pdf]

**Genome-wide association study reveals candidate genes for flowering time variation in common bean (*Phaseolus vulgaris* L.)**

Lorenzo Raggi<sup>1a\*</sup>, Leonardo Caproni<sup>1a</sup>, Andrea Carboni<sup>2</sup> and Valeria Negri<sup>1</sup>

<sup>1</sup> Dipartimento di Scienze Agrarie, Alimentari e Ambientali (DSA3), Università degli Studi di Perugia, Perugia, Italy

<sup>2</sup> Consiglio per la Ricerca in Agricoltura e l'analisi dell'economia agraria. Centro di Ricerca Cerealicoltura e Colture Industriali (CREA-CI), Bologna, Italy

\*Corresponding author: lorenzo.raggi@unipg.it; phone number +39 075 5856212

**Supplementary FIGURE 1.** Boxplot of *dtf* recorded in Perugia 2016 and 2017 (PG\_16 and PG\_17) and Bologna 2017 (BO\_17) elaborated for Andean (blue) and Mesoamerican (red) subpopulations. Assignment to the different gene pools based on phaseolin information. Genotypes that did not flower were recorded as 162 days.

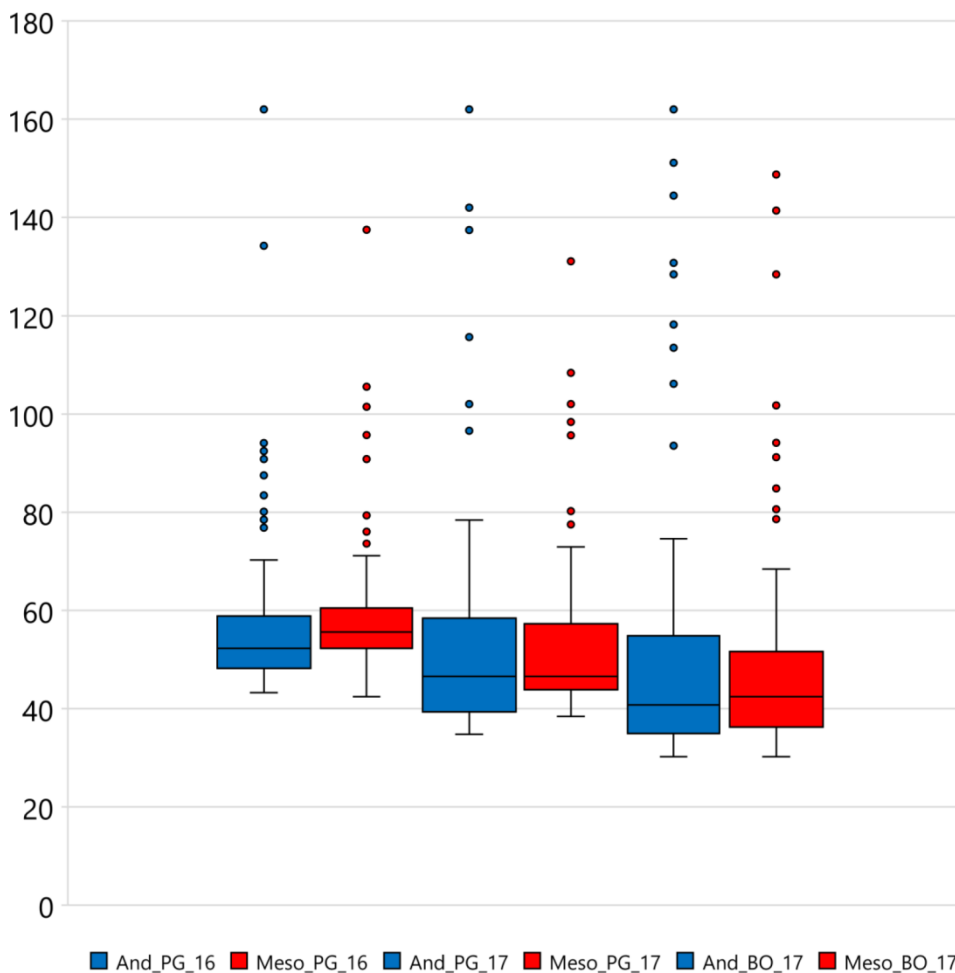

**Supplementary FIGURE 2.** SNP density within 1Mb window size of the reduced SNP dataset (2518) used to perform STRUCTURE and cryptic relatedness analyses; different colours represent different density levels. In the Figure “Chr” refers to common bean chromosomes.

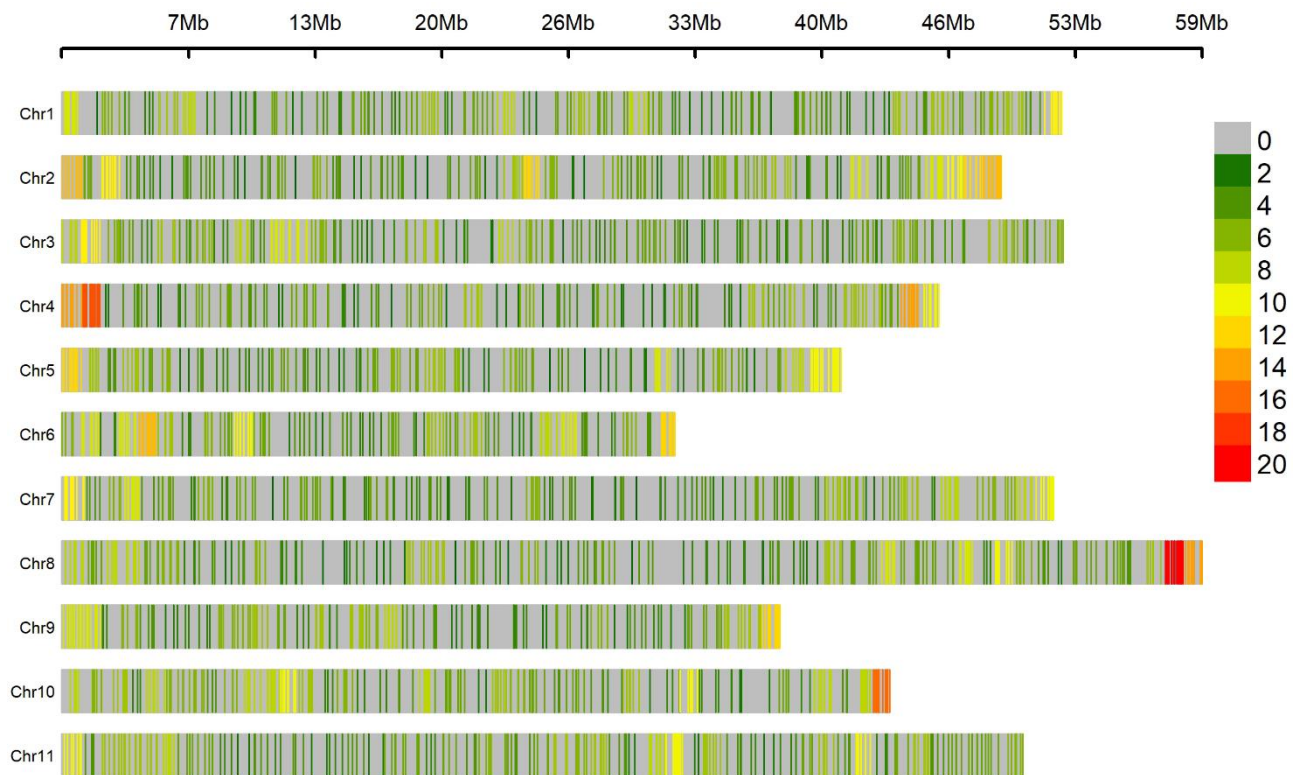

**Supplementary TABLE 1.** List of the 192 common bean lines developed by the Department of Agricultural, Food and Environmental Sciences (DSA3) of the University of Perugia. For each line, relevant information about the original accession, from which the line has been developed, are reported.

| Line Accession Number | Original Accession Number | Collection of Reference | Common Name                 | Biological Status <sup>a</sup> | Continent <sup>b</sup> | Country of Origin | Growth Habit        | Phaseolin Type <sup>c</sup> |
|-----------------------|---------------------------|-------------------------|-----------------------------|--------------------------------|------------------------|-------------------|---------------------|-----------------------------|
| 6143                  | PHA2198                   | IPK                     | PHA2198                     | L                              | EU                     | SVK               | Climbing            | S                           |
| 6181                  | PI-307786                 | USDA                    | S-215-N                     | L                              | AC                     | SLV               | Climbing            | T                           |
| 6235                  | PI-313313                 | USDA                    | Bayo rata                   | L                              | AC                     | MEX               | Climbing            | S                           |
| 6245                  | PI-203934                 | USDA                    | PI-203934                   | L                              | AC                     | MEX               | Climbing            | S                           |
| 6246                  | PI-309755                 | USDA                    | Rosa de Castillo            | L                              | AC                     | MEX               | Climbing            | S                           |
| 6247                  | PI-312092                 | USDA                    | Frijol Garrapato            | L                              | AC                     | MEX               | Climbing            | S                           |
| 6262                  | W6-18758                  | USDA                    | Poroto overo                | L                              | AS                     | ARG               | Climbing            | T                           |
| 6265                  | W-18750                   | IPK                     | Poroto chaucha              | L                              | AS                     | ARG               | Prostrate- indeterm | C                           |
| 6267                  | PI290998                  | USDA                    | Frijol Negro                | L                              | AS                     | PER               | Prostrate- indeterm | T                           |
| 7173                  | G20355A                   | CIAT                    | Pesak                       | L                              | EU                     | MAC               | Bushy- indeterm     | C                           |
| 7396                  | 4646                      | UNIPG                   | O Marrozzo rampicante       | L                              | EU                     | ITA               | Climbing            | C                           |
| 7397                  | 7185                      | UNIPG                   | Kaimano                     | C                              | EU                     | ITA               | Climbing            | NA                          |
| 7398                  | G15440                    | CIAT                    | Cachamundinho I             | L                              | EU                     | POR               | Prostrate-indeterm. | S                           |
| 7399                  | G16779                    | CIAT                    | Turkey 717-1-5              | L                              | EU                     | TUR               | Bushy- indeterm     | T                           |
| 7400                  | G17944                    | CIAT                    | Nyirbatori Tf 2816          | L                              | EU                     | HUN               | Bushy               | C                           |
| 7401                  | G20351                    | CIAT                    | Niska                       | L                              | EU                     | MAC               | Climbing            | S                           |
| 7402                  | 7181                      | UNIPG                   | Ceres                       | C                              | EU                     | ITA               | Bushy               | NA                          |
| 7403                  | PI-151014                 | USDA                    | Amarillos                   | L                              | AS                     | CHI               | Bushy               | C                           |
| 7404                  | PI-290995                 | USDA                    | Canario                     | L                              | AS                     | PER               | Bushy               | T                           |
| 7405                  | G8029                     | CIAT                    | Noire D'Evian               | L                              | EU                     | FRA               | Bushy               | C                           |
| 7406                  | G14765                    | CIAT                    | Coco Leguyader              | L                              | EU                     | FRA               | Bushy               | T                           |
| 7407                  | G14786                    | CIAT                    | Le Grignorais               | L                              | EU                     | FRA               | Bushy               | T                           |
| 7408                  | G3613                     | CIAT                    | Alemania                    | L                              | EU                     | GER               | Bushy               | T                           |
| 7409                  | PHA12                     | IPK                     | PHA12                       | L                              | EU                     | GRE               | Bushy               | T                           |
| 7410                  | 4652                      | UNIPG                   | Borlotto basso              | L                              | EU                     | ITA               | Bushy               | T                           |
| 7411                  | 5071                      | UNIPG                   | Lodola precoce nano         | L                              | EU                     | ITA               | Bushy               | T                           |
| 7412                  | 7412                      | UNIPG                   | SOLIBAM_Line_11             | C                              | EU                     | ITA               | Bushy               | C                           |
| 7413                  | 3500                      | UNIPG                   | Cannellino Piccolo          | L                              | EU                     | ITA               | Bushy               | C                           |
| 7414                  | 3722                      | UNIPG                   | Quarantino                  | L                              | EU                     | ITA               | Bushy               | T                           |
| 7415                  | 4299                      | UNIPG                   | San Pietro                  | L                              | EU                     | ITA               | Bushy               | T                           |
| 7416                  | 4296                      | UNIPG                   | Cannellino                  | L                              | EU                     | ITA               | Bushy               | T                           |
| 7417                  | 5079                      | UNIPG                   | Rosso lucchese              | L                              | EU                     | ITA               | Bushy               | T                           |
| 7418                  | G10077                    | CIAT                    | Rottekeutel                 | L                              | EU                     | NLD               | Bushy               | T                           |
| 7419                  | G10064                    | CIAT                    | Kogelboon                   | L                              | EU                     | NLD               | Bushy               | T                           |
| 7420                  | G10074                    | CIAT                    | Aff.Berna                   | L                              | EU                     | NLD               | Bushy               | T                           |
| 7421                  | G10110                    | CIAT                    | Rode Kievit                 | L                              | EU                     | NLD               | Bushy               | T                           |
| 7422                  | G15930                    | CIAT                    | Bruine Boon                 | L                              | EU                     | NLD               | Bushy               | T                           |
| 7423                  | G18045                    | CIAT                    | Kennemer Bruine             | L                              | EU                     | NLD               | Bushy               | T                           |
| 7424                  | G8111                     | CIAT                    | Katarina Type 3             | L                              | EU                     | POR               | Bushy               | T                           |
| 7425                  | G10298                    | CIAT                    | Barrio Pole Red Montegaro   | L                              | EU                     | POR               | Bushy               | T                           |
| 7426                  | G387                      | CIAT                    | Kukgunuk                    | L                              | EU                     | TUR               | Bushy               | T                           |
| 7427                  | G20427                    | CIAT                    | Oturak Fasulye              | L                              | EU                     | TUR               | Bushy               | T                           |
| 7428                  | MIDAS                     | UNIVPM                  | Midas                       | L                              | AS                     | ARG               | Bushy- indeterm     | T                           |
| 7429                  | PI-156669                 | USDA                    | PI-156669                   | L                              | AS                     | BOL               | Bushy- indeterm     | C                           |
| 7430                  | PI-352748                 | USDA                    | Gordo                       | L                              | AS                     | BRA               | Bushy- indeterm     | C                           |
| 7431                  | PI-151015                 | USDA                    | Azulillo                    | L                              | AS                     | CHI               | Bushy- indeterm     | C                           |
| 7432                  | PI-290989                 | USDA                    | Diacol Catio                | L                              | AS                     | PER               | Bushy- indeterm     | T                           |
| 7433                  | PHA3677                   | IPK                     | PHA3677                     | L                              | EU                     | AU                | Bushy- indeterm     | T                           |
| 7434                  | PHA358                    | IPK                     | PHA358                      | L                              | EU                     | GRE               | Bushy- indeterm     | T                           |
| 7435                  | G51731                    | CIAT                    | Long Partridge Bean         | L                              | EU                     | HUN               | Bushy- indeterm     | T                           |
| 7436                  | G20259                    | CIAT                    | Sut                         | L                              | EU                     | MAC               | Bushy- indeterm     | T                           |
| 7438                  | PHA1474                   | IPK                     | PHA1474                     | L                              | EU                     | SVK               | Bushy- indeterm     | C                           |
| 7439                  | G15790                    | CIAT                    | Banja Type, Catarino Type   | L                              | EU                     | ESP               | Bushy- indeterm     | C                           |
| 7440                  | G14413                    | CIAT                    | Mantecosa, Quaranta Dias    | C                              | EU                     | ESP               | Bushy- indeterm     | T                           |
| 7442                  | W6-17487                  | USDA                    | W6-17487                    | L                              | AS                     | ARG               | Climbing            | C                           |
| 7444                  | W6-18792                  | USDA                    | W6-18792                    | L                              | AS                     | ARG               | Climbing            | T                           |
| 7445                  | PI-282031                 | USDA                    | Milagros                    | L                              | AS                     | CHI               | Climbing            | T                           |
| 7446                  | PI-282000                 | USDA                    | Pintados                    | C                              | AS                     | CHI               | Climbing            | T                           |
| 7447                  | PHA2677                   | IPK                     | PHA2677                     | L                              | EU                     | BGR               | Climbing            | C                           |
| 7448                  | G8013A                    | CIAT                    | Fin De Bagnols              | L                              | EU                     | FRA               | Climbing            | T                           |
| 7449                  | PHA3739                   | IPK                     | Saris lobio                 | L                              | EU                     | GEO               | Climbing            | C                           |
| 7450                  | PHA303                    | IPK                     | PHA303                      | L                              | EU                     | GRE               | Climbing            | T                           |
| 7452                  | VARI2                     | UNIBAS                  | VARI2                       | L                              | EU                     | ITA               | Climbing            | C                           |
| 7453                  | 3713                      | UNIPG                   | Borlotto bianco             | L                              | EU                     | ITA               | Climbing            | C                           |
| 7454                  | 4362                      | UNIPG                   | Pisello bianco              | L                              | EU                     | ITA               | Climbing            | C                           |
| 7455                  | 4959                      | UNIPG                   | Della Valle                 | L                              | EU                     | ITA               | Climbing            | C                           |
| 7456                  | 5055                      | UNIPG                   | Faxeu de Milan              | L                              | EU                     | ITA               | Climbing            | C                           |
| 7457                  | 3506                      | UNIPG                   | Cannellino                  | L                              | EU                     | ITA               | Climbing            | T                           |
| 7458                  | 4102                      | UNIPG                   | Bianco                      | L                              | EU                     | ITA               | Climbing            | T                           |
| 7459                  | 4294                      | UNIPG                   | Mezza Rama                  | L                              | EU                     | ITA               | Climbing            | C                           |
| 7460                  | 4361                      | UNIPG                   | Borlotto chiaro da minestra | L                              | EU                     | ITA               | Climbing            | C                           |
| 7461                  | 4455                      | UNIPG                   | A Pane                      | L                              | EU                     | ITA               | Climbing            | C                           |
| 7462                  | 4458                      | UNIPG                   | Aquilano                    | L                              | EU                     | ITA               | Climbing            | C                           |
| 7463                  | 4554                      | UNIPG                   | Carnaccia                   | L                              | EU                     | ITA               | Climbing            | C                           |
| 7464                  | 5040                      | UNIPG                   | Borlotto                    | L                              | EU                     | ITA               | Climbing            | C                           |
| 7465                  | 5047                      | UNIPG                   | Laurons                     | L                              | EU                     | ITA               | Climbing            | C                           |
| 7466                  | 5049                      | UNIPG                   | Militons                    | L                              | EU                     | ITA               | Climbing            | T                           |

|      |              |        |                                 |   |    |           |                     |   |
|------|--------------|--------|---------------------------------|---|----|-----------|---------------------|---|
| 7467 | 5053         | UNIPG  | Ballin de loto                  | L | EU | ITA       | Climbing            | C |
| 7468 | 5084         | UNIPG  | Del gaggio                      | L | EU | ITA       | Climbing            | T |
| 7469 | 4087         | UNIPG  | Borlotto nano                   | L | EU | ITA       | Climbing            | C |
| 7470 | 4956         | UNIPG  | Meraviglia                      | L | EU | ITA       | Climbing            | C |
| 7471 | G20110A      | CIAT   | Cucavec                         | L | EU | MAC       | Climbing            | T |
| 7472 | G10100       | CIAT   | Stokkievitsboon                 | L | EU | NLD       | Climbing            | T |
| 7473 | G15921       | CIAT   | Snijboon                        | L | EU | NLD       | Climbing            | T |
| 7474 | G10234       | CIAT   | Pole Yellowish Buff             | L | EU | POR       | Climbing            | T |
| 7475 | G10230       | CIAT   | Pole Deep Purple Kidney         | L | EU | POR       | Climbing            | C |
| 7476 | PHA3065      | IPK    | PHA3065                         | L | EU | ROU       | Climbing            | C |
| 7477 | G13936       | CIAT   | Don Timoteo                     | L | EU | ESP       | Climbing            | C |
| 7478 | G1029        | CIAT   | Herraduca Argentinos            | L | EU | ESP       | Climbing            | C |
| 7479 | G10154       | CIAT   | Dwarf Redonda                   | L | EU | ESP       | Climbing            | C |
| 7480 | G461         | CIAT   | Maras                           | L | EU | TUR       | Climbing            | T |
| 7481 | G316         | CIAT   | Barbunya                        | L | EU | TUR       | Climbing            | C |
| 7482 | Jalo EEP558  | UNIBAS | Jalo EEP558                     | L | AS | ARG       | Prostrate- indeterm | T |
| 7483 | G13765       | CIAT   | Anadoran                        | L | AS | BRA       | Prostrate- indeterm | C |
| 7485 | PHA2134      | IPK    | PHA2134                         | L | EU | GEO       | Prostrate- indeterm | T |
| 7486 | G11826       | CIAT   | Mohacsi Lila Furj               | L | EU | HUN       | Prostrate- indeterm | T |
| 7487 | PHA2360      | IPK    | PHA2360                         | L | EU | ITA       | Prostrate- indeterm | T |
| 7488 | G10062       | CIAT   | Aff.Berna (V.Namen)             | L | EU | NLD       | Prostrate- indeterm | T |
| 7489 | G15443       | CIAT   | Pole Large Seeded R.Kidney      | L | EU | POR       | Prostrate- indeterm | T |
| 7490 | PHA3063      | IPK    | PHA3063                         | L | EU | ROU       | Prostrate- indeterm | T |
| 7491 | G14405       | CIAT   | Burros Argentinos Type          | L | EU | ESP       | Prostrate- indeterm | C |
| 7492 | NGB9299.3    | NGB    | NGB9299.3                       | C | EU | SWE       | Prostrate- indeterm | T |
| 7493 | G15856       | CIAT   | Yenidunya Fasulya               | L | EU | TUR       | Prostrate- indeterm | C |
| 7494 | 4293         | UNIPG  | Zolferino                       | L | EU | ITA       | NA                  | T |
| 7495 | 4916         | UNIPG  | Borlotto nano                   | L | EU | ITA       | Bushy               | T |
| 7496 | 4110         | UNIPG  | Zolferino                       | L | EU | ITA       | NA                  | T |
| 7497 | G17830A      | CIAT   | Fulokercsi Tf 2608              | L | EU | HUN       | Bushy               | S |
| 7498 | 4616         | UNIPG  | Di Onano Gradoli                | L | EU | ITA       | Bushy               | S |
| 7499 | 4406         | UNIPG  | Del Purgatorio                  | L | EU | ITA       | Bushy               | S |
| 7500 | 4135         | UNIPG  | Nero                            | L | EU | ITA       | Bushy               | S |
| 7501 | G11151       | CIAT   | Perle                           | L | EU | Lithuania | Bushy               | S |
| 7502 | G3763        | CIAT   | Noire Hatif De Belgique         | L | EU | Belgium   | Bushy-indeterm.     | S |
| 7503 | PHA1781      | IPK    | PHA1781                         | L | EU | GER       | Bushy-indeterm.     | S |
| 7504 | 5069         | UNIPG  | Bianco con tralcio senza frasca | L | EU | ITA       | Bushy-indeterm.     | S |
| 7505 | G10112       | CIAT   | Citroen (Lpt)                   | L | EU | NLD       | Bushy-indeterm.     | S |
| 7506 | G10210       | CIAT   | Dwarf Port Viana                | L | EU | POR       | Bushy-indeterm.     | S |
| 7507 | G10252       | CIAT   | Cachamundinho Semi-Climb.       | L | EU | POR       | Bushy-indeterm.     | S |
| 7508 | G993         | CIAT   | Alubia Pinta De Leon            | L | EU | ESP       | Bushy-indeterm.     | S |
| 7509 | G11573       | CIAT   | Avellaneta Negra, 375 Vol Niger | L | EU | ESP       | Bushy-indeterm.     | S |
| 7510 | NGB11752.2   | NGB    | NGB11752.2                      | L | EU | SWE       | Bushy-indeterm.     | S |
| 7511 | G900         | CIAT   | Ohlsenia Oe/47                  | L | EU | SWE       | Bushy-indeterm.     | S |
| 7512 | G2925        | CIAT   | Selection From Pi204715         | L | EU | TUR       | Bushy-indeterm.     | S |
| 7513 | G16741       | CIAT   | Turkey Bursa 12c                | L | EU | TUR       | Bushy-indeterm.     | S |
| 7514 | G1018        | CIAT   | Black Mexican                   | L | AC | MEX       | Bushy-indeterm.     | S |
| 7515 | PI-309837    | USDA   | Frijol chileno y colorado       | L | AC | CRI       | Climbing            | S |
| 7516 | PI-309831    | USDA   | Frijol Carne                    | L | AC | CRI       | Climbing            | S |
| 7517 | PI-309885    | USDA   | Chimbolos                       | L | AC | CRI       | Climbing            | S |
| 7518 | PI-311794    | USDA   | Tineco Rojo                     | L | AC | SLV       | Climbing            | S |
| 7519 | PI-304113    | USDA   | Ch-60-111-2                     | L | AC | SLV       | Climbing            | S |
| 7520 | PI-310586    | USDA   | Sangre de Toro                  | L | AC | HND       | Climbing            | S |
| 7525 | PI-416407    | USDA   | Jamapa                          | C | AC | MEX       | Climbing            | S |
| 7526 | PI-583642    | USDA   | Carioca                         | L | AS | BRA       | Climbing            | S |
| 7527 | PI-151017    | USDA   | Bayos Palos                     | L | AS | CHI       | Climbing            | S |
| 7528 | PI-152326    | USDA   | Negro Redondo                   | L | AS | ECU       | Climbing            | S |
| 7529 | PI-306149    | USDA   | Caraota                         | L | AS | PER       | Climbing            | S |
| 7530 | PHA6857      | IPK    | PHA6857                         | L | EU | ALB       | Climbing            | S |
| 7531 | PHA5913      | IPK    | Barbunjë                        | L | EU | ALB       | Climbing            | S |
| 7532 | PHA6266      | IPK    | PHA6266                         | L | EU | ALB       | Climbing            | S |
| 7533 | PHA3640      | IPK    | PHA3640                         | L | EU | AU        | Climbing            | S |
| 7534 | PHA7079      | IPK    | Barbunjë                        | L | EU | BGR       | Climbing            | S |
| 7535 | 09L0506251   | UNIBAS | NA                              | L | EU | CZE       | Climbing            | S |
| 7536 | PHA2786      | IPK    | PHA2786                         | L | EU | GEO       | Climbing            | S |
| 7537 | PHA7002      | IPK    | PHA7002                         | L | EU | GER       | Climbing            | S |
| 7538 | 58431SemeBia | UNIBAS | 58431 Seme Bianco               | L | EU | GER       | Climbing            | S |
| 7539 | PHA285       | IPK    | PHA285                          | L | EU | GRE       | Climbing            | S |
| 7540 | PHA3927      | IPK    | PHA3927                         | L | EU | HUN       | Climbing            | S |
| 7541 | PHA1933      | IPK    | PHA1933                         | L | EU | ITA       | Climbing            | S |
| 7542 | PHA1916      | IPK    | PHA1916                         | L | EU | ITA       | Climbing            | S |
| 7543 | 5058         | UNIPG  | Lambardèn                       | L | EU | ITA       | Climbing            | S |
| 7544 | 4295         | UNIPG  | Grigio                          | L | EU | ITA       | Climbing            | S |
| 7545 | 4459         | UNIPG  | Mangiatutto                     | L | EU | ITA       | Climbing            | S |
| 7546 | 5080         | UNIPG  | Staiccioli                      | L | EU | ITA       | Climbing            | S |
| 7547 | 3726         | UNIPG  | Cannellino                      | L | EU | ITA       | Climbing            | S |
| 7548 | 4651         | UNIPG  | Fagiolo Alto al Burro           | L | EU | ITA       | Climbing            | S |
| 7549 | 5057         | UNIPG  | Cesarins                        | L | EU | ITA       | Climbing            | S |
| 7550 | G20087       | CIAT   | Edar Visek                      | L | EU | MAC       | Climbing            | S |
| 7551 | G20109       | CIAT   | Krupen                          | L | EU | MAC       | Climbing            | S |
| 7552 | G20291       | CIAT   | Nizok                           | L | EU | MAC       | Climbing            | S |
| 7553 | PHA1684      | IPK    | PHA1684                         | L | EU | POL       | Climbing            | S |
| 7554 | G10241       | CIAT   | Pole Par.De Cowa White Lrg      | L | EU | POR       | Climbing            | S |
| 7555 | G10248A      | CIAT   | Semiclimber Var. Flat Pods      | L | EU | POR       | Climbing            | S |
| 7557 | G14415       | CIAT   | G14415                          | L | EU | ESP       | Climbing            | S |
| 7558 | G15293       | CIAT   | White Coco Type                 | L | EU | ESP       | Climbing            | S |
| 7559 | PHA130       | IPK    | PHA130                          | L | EU | TUR       | Climbing            | S |
| 7560 | G15618       | CIAT   | Oturak Fasulya                  | L | EU | TUR       | Climbing            | S |

|      |           |       |                            |   |    |     |                     |    |
|------|-----------|-------|----------------------------|---|----|-----|---------------------|----|
| 7561 | G309      | CIAT  | Aysekadin                  | L | EU | TUR | Climbing            | S  |
| 7562 | PHA5937   | IPK   | PHA5937                    | L | EU | UKR | Climbing            | S  |
| 7563 | PI-309842 | USDA  | Chimbolo                   | L | AC | CRI | Prostrate-indeterm. | S  |
| 7564 | PI-308891 | USDA  | Frijol amarillo            | L | AC | CRI | Prostrate-indeterm. | S  |
| 7565 | PI-345574 | USDA  | Jamapa                     | L | AC | CRI | Prostrate-indeterm. | S  |
| 7566 | PI-196927 | USDA  | Frijol Criollo             | L | AC | MEX | Prostrate-indeterm. | S  |
| 7567 | PI-300668 | USDA  | Negro Argel                | L | AS | CHI | Prostrate-indeterm. | S  |
| 7568 | PI-313888 | USDA  | Col. No. 65                | C | AS | VEN | Prostrate-indeterm. | S  |
| 7569 | G20198A   | CIAT  | Bel Nizok                  | L | EU | HRV | Prostrate-indeterm. | S  |
| 7570 | G20238    | CIAT  | Lokvicka                   | L | EU | HRV | Prostrate-indeterm. | S  |
| 7571 | G15927    | CIAT  | Fijne Kleine Boon          | L | EU | NLD | Prostrate-indeterm. | S  |
| 7572 | G11854    | CIAT  | Walcherse Witte (Lpt)      | L | EU | NLD | Prostrate-indeterm. | S  |
| 7573 | G14699    | CIAT  | Seleccion De Mezcla Ix     | L | EU | POR | Prostrate-indeterm. | S  |
| 7574 | G10164    | CIAT  | Long White Kidney Tipe-Pol | L | EU | ESP | Prostrate-indeterm. | S  |
| 7575 | G15231    | CIAT  | Riñon Pequeña              | L | EU | ESP | Prostrate-indeterm. | S  |
| 7576 | G15574    | CIAT  | Beyaz Fasulya              | L | EU | TUR | Prostrate-indeterm. | S  |
| 7577 | G15881    | CIAT  | Yer Fasulyasi              | L | EU | TUR | Prostrate-indeterm. | S  |
| 7578 | 4914      | UNIPG | Bianco                     | L | EU | ITA | NA                  | S  |
| 7579 | 6388      | UNIPG | St. Esprit                 | L | EU | FRA | Bushy               | NA |
| 7580 | 6389      | UNIPG | Flageolet Chevrier         | L | EU | FRA | Bushy               | NA |
| 7581 | 6390      | UNIPG | Rognon de Coq              | L | EU | FRA | Bushy               | NA |
| 7582 | 7582      | UNIPG | Magico (Borlotto)          | C | EU | ITA | Bushy               | NA |
| 7583 | 7583      | UNIPG | Telemaco (Mangiatutto)     | C | EU | ITA | Bushy               | NA |
| 7584 | 6387      | UNIPG | Roi de Belges              | L | EU | FRA | Bushy               | NA |
| 7585 | 7585      | UNIPG | White Top (Cannellino)     | C | EU | ITA | Bushy               | NA |
| 7586 | 7586      | UNIPG | Dipinto (Borlotto)         | C | EU | ITA | Climbing            | NA |
| 7587 | 7587      | UNIPG | Kondor (Cannellino)        | C | EU | ITA | Climbing            | NA |

<sup>a</sup>C=cultivar; L=landrace. <sup>b</sup>AC=America, Central; AS=America, South; EU=Europe. <sup>c</sup>NA=Not Available.

**Supplementary TABLE 2.** BLUPs dataset of days to flowering.

| <b>Line (Accession Number)</b> | <b>PG-2016</b> | <b>PG-2017</b> | <b>BO-2017</b> |
|--------------------------------|----------------|----------------|----------------|
| 6143                           | 50.64          | 46.59          | 44.18          |
| 6181                           | 162.00         | 162.00         | 162.00         |
| 6235                           | 105.55         | 108.38         | 141.43         |
| 6245                           | 90.80          | 80.21          | 101.73         |
| 6246                           | 137.52         | 131.09         | 148.75         |
| 6247                           | 96.54          | 102.02         | 128.42         |
| 6262                           | NA             | 142.00         | 130.77         |
| 6265                           | NA             | 39.32          | 36.85          |
| 6267                           | NA             | 102.93         | 144.46         |
| 7173                           | NA             | 115.65         | 128.42         |
| 7396                           | 84.44          | 69.46          | 73.44          |
| 7397                           | 63.18          | 74.20          | 84.77          |
| 7398                           | 57.62          | 56.32          | 80.60          |
| 7399                           | 70.26          | 52.60          | 54.17          |
| 7400                           | 65.47          | 48.48          | 40.77          |
| 7401                           | 57.68          | 57.25          | 40.76          |
| 7402                           | 46.11          | 46.93          | 33.57          |
| 7403                           | NA             | 38.42          | 32.56          |
| 7404                           | 87.52          | NA             | NA             |
| 7405                           | 51.46          | 44.78          | 36.85          |
| 7406                           | NA             | 46.59          | 36.02          |
| 7407                           | 46.54          | 35.69          | 32.56          |
| 7408                           | 47.36          | 36.60          | 34.92          |
| 7409                           | 53.92          | 52.95          | 37.95          |
| 7410                           | 44.90          | 35.69          | 32.56          |
| 7411                           | 44.90          | 38.42          | 34.92          |
| 7412                           | 45.72          | 38.42          | 34.92          |
| 7413                           | 58.02          | 40.23          | 36.02          |
| 7414                           | 43.26          | 34.78          | 33.95          |
| 7415                           | 49.82          | 40.23          | 38.92          |
| 7416                           | 48.18          | 40.23          | 37.82          |
| 7417                           | 48.18          | 38.42          | 34.50          |
| 7418                           | 45.72          | 35.69          | 30.21          |
| 7419                           | 44.90          | 36.60          | 35.47          |
| 7420                           | 50.64          | 36.60          | 30.21          |
| 7421                           | 47.36          | 40.23          | 34.92          |
| 7422                           | 55.56          | 38.42          | 33.53          |
| 7423                           | 46.54          | 38.42          | 31.18          |
| 7424                           | 44.90          | 40.23          | 32.56          |
| 7425                           | 46.54          | 37.51          | 36.85          |
| 7426                           | 92.44          | 96.57          | 106.15         |
| 7427                           | 49.00          | 59.31          | 42.80          |
| 7428                           | 53.10          | 41.14          | 36.02          |
| 7429                           | 49.00          | 38.42          | 31.18          |
| 7430                           | 80.14          | 62.95          | 57.32          |
| 7431                           | 77.69          | 45.68          | 54.83          |
| 7432                           | 47.36          | 44.78          | 55.80          |

|      |        |        |        |
|------|--------|--------|--------|
| 7433 | 54.74  | 41.14  | 33.95  |
| 7434 | 44.90  | 36.60  | 31.59  |
| 7435 | 52.28  | 55.68  | 46.12  |
| 7436 | 44.90  | 38.42  | 33.95  |
| 7438 | 46.54  | 42.05  | 36.02  |
| 7439 | 55.56  | 48.41  | 57.32  |
| 7440 | 50.64  | 36.60  | 34.50  |
| 7442 | 134.24 | 137.45 | 151.11 |
| 7444 | 135.06 | 138.36 | 145.30 |
| 7445 | 90.80  | 72.03  | 118.19 |
| 7446 | 50.64  | 38.42  | 36.02  |
| 7447 | 53.10  | 54.77  | 37.95  |
| 7448 | NA     | NA     | NA     |
| 7449 | 77.69  | 62.04  | 47.50  |
| 7450 | 54.74  | 46.59  | 46.12  |
| 7452 | 52.28  | 55.68  | 40.73  |
| 7453 | 50.64  | 62.95  | 50.96  |
| 7454 | 49.82  | 46.59  | 40.73  |
| 7455 | 59.65  | 70.22  | 72.26  |
| 7456 | 50.64  | 52.95  | 40.73  |
| 7457 | 53.10  | 42.96  | 41.83  |
| 7458 | 54.74  | 46.59  | 51.51  |
| 7459 | 49.00  | 59.31  | 39.89  |
| 7460 | 45.72  | 54.77  | 40.73  |
| 7461 | 49.00  | 61.13  | 43.63  |
| 7462 | 54.74  | 62.04  | 57.32  |
| 7463 | NA     | 102.02 | 113.48 |
| 7464 | 53.10  | 54.77  | 74.62  |
| 7465 | 58.83  | 58.41  | 56.22  |
| 7466 | 50.64  | 47.50  | 38.37  |
| 7467 | 67.03  | 60.22  | 46.67  |
| 7468 | 53.10  | 46.59  | 42.80  |
| 7469 | 53.92  | 39.32  | 36.85  |
| 7470 | 49.82  | 39.32  | 38.37  |
| 7471 | 53.92  | 42.96  | 42.24  |
| 7472 | 58.83  | 55.68  | 44.18  |
| 7473 | 55.56  | 47.50  | 40.73  |
| 7474 | 51.46  | 42.96  | 38.37  |
| 7475 | 55.56  | 52.95  | 43.63  |
| 7476 | 53.10  | 51.14  | 44.73  |
| 7477 | 94.08  | 78.39  | 113.48 |
| 7478 | 76.87  | 46.59  | 45.15  |
| 7479 | NA     | 45.68  | 38.37  |
| 7480 | 80.96  | 72.03  | 93.56  |
| 7481 | 51.46  | 53.86  | 41.83  |
| 7482 | 83.42  | 58.41  | 69.91  |
| 7483 | 54.74  | 52.05  | 55.80  |
| 7485 | 52.28  | 42.05  | 36.02  |
| 7486 | 55.56  | 52.95  | 66.03  |

|      |        |       |       |
|------|--------|-------|-------|
| 7487 | 46.54  | 42.96 | 34.92 |
| 7488 | 49.00  | 38.42 | 33.53 |
| 7489 | NA     | 56.59 | 69.91 |
| 7490 | 62.93  | 43.87 | 43.63 |
| 7491 | 52.28  | 47.50 | 40.73 |
| 7492 | 45.72  | 37.51 | 32.56 |
| 7493 | 78.51  | 58.41 | 38.92 |
| 7494 | 50.64  | 43.87 | 38.92 |
| 7495 | 44.90  | 38.42 | 31.18 |
| 7496 | 48.18  | 42.96 | 33.53 |
| 7497 | 49.00  | 41.14 | 34.50 |
| 7498 | 61.29  | 42.96 | 35.47 |
| 7499 | 52.28  | 44.78 | 36.02 |
| 7500 | 47.36  | 47.50 | 43.63 |
| 7501 | 53.10  | 47.50 | 36.02 |
| 7502 | 49.82  | 44.78 | 39.89 |
| 7503 | 95.72  | 98.38 | 94.11 |
| 7504 | 52.28  | 46.59 | 38.37 |
| 7505 | 52.28  | 42.96 | 40.73 |
| 7506 | 76.05  | 44.78 | 44.18 |
| 7507 | 52.28  | NA    | 91.21 |
| 7508 | NA     | 47.50 | 62.03 |
| 7509 | 57.20  | 47.50 | 43.63 |
| 7510 | 47.36  | 41.14 | 34.92 |
| 7511 | 53.10  | 41.14 | 36.85 |
| 7512 | 55.56  | 61.13 | 30.21 |
| 7513 | 61.29  | 55.68 | 54.83 |
| 7514 | 63.75  | 65.67 | 52.35 |
| 7515 | 61.29  | 58.41 | 46.54 |
| 7516 | 42.44  | 48.41 | 49.44 |
| 7517 | 79.33  | 59.31 | 68.39 |
| 7518 | 57.20  | 45.68 | 42.24 |
| 7519 | NA     | 65.67 | 58.16 |
| 7520 | 71.13  | 46.59 | 41.83 |
| 7525 | 57.20  | 48.41 | 40.73 |
| 7526 | 54.74  | 45.68 | 37.95 |
| 7527 | 51.46  | 42.05 | 40.73 |
| 7528 | 57.20  | 46.59 | 42.66 |
| 7529 | 73.59  | 66.58 | 59.67 |
| 7530 | 52.28  | 42.05 | 39.89 |
| 7531 | 51.46  | 41.14 | 36.02 |
| 7532 | 54.74  | 43.87 | 44.73 |
| 7533 | 52.28  | 45.68 | 42.66 |
| 7534 | 52.28  | 40.23 | 35.47 |
| 7535 | 53.10  | 46.59 | 36.02 |
| 7536 | 101.45 | 95.66 | 84.85 |
| 7537 | 58.83  | 39.32 | 36.02 |
| 7538 | 52.28  | 40.23 | 34.50 |
| 7539 | 52.28  | 40.23 | 33.11 |



|      |       |       |       |
|------|-------|-------|-------|
| 7540 | 52.28 | 45.68 | 42.24 |
| 7541 | 60.47 | 46.59 | 45.15 |
| 7542 | 63.75 | 45.68 | 39.89 |
| 7543 | 55.56 | 54.77 | 45.15 |
| 7544 | 52.28 | 44.78 | 34.50 |
| 7545 | 55.56 | 48.41 | 41.28 |
| 7546 | 55.56 | 65.67 | 58.16 |
| 7547 | 53.10 | 48.41 | 42.66 |
| 7548 | 46.54 | 38.42 | 31.18 |
| 7549 | 49.82 | 39.32 | 31.18 |
| 7550 | 65.39 | 48.41 | 48.60 |
| 7551 | 55.56 | 59.31 | 78.62 |
| 7552 | 52.28 | 40.23 | 34.50 |
| 7553 | 58.02 | 52.05 | 46.12 |
| 7554 | 66.21 | 69.31 | 58.16 |
| 7555 | 62.11 | 77.49 | 52.48 |
| 7557 | 53.10 | 39.32 | 33.53 |
| 7558 | 49.82 | 44.78 | 43.63 |
| 7559 | 60.47 | 59.31 | 68.39 |
| 7560 | 55.56 | 46.59 | 36.02 |
| 7561 | 55.56 | 72.03 | 59.67 |
| 7562 | 52.28 | 44.78 | 37.95 |
| 7563 | 76.05 | 72.94 | 61.61 |
| 7564 | 58.02 | 44.78 | 39.89 |
| 7565 | 58.83 | 46.59 | 42.66 |
| 7566 | 55.56 | 46.59 | 42.24 |
| 7567 | 54.74 | 55.68 | 44.60 |
| 7568 | 57.20 | 46.59 | 38.92 |
| 7569 | 49.82 | 47.50 | 36.85 |
| 7570 | 49.82 | 39.32 | 35.47 |
| 7571 | 56.38 | 59.31 | 47.50 |
| 7572 | 52.28 | 39.32 | 38.37 |
| 7573 | 55.56 | 47.50 | 37.95 |
| 7574 | 54.74 | 43.87 | 42.80 |
| 7575 | 52.28 | 51.14 | 34.92 |
| 7576 | 44.90 | 39.32 | 33.95 |
| 7577 | NA    | 43.87 | 46.67 |
| 7578 | 55.56 | 45.68 | 46.12 |
| 7579 | 40.80 | 40.23 | 36.85 |
| 7580 | 47.36 | 41.14 | 37.95 |
| 7581 | 52.28 | 40.23 | 32.56 |
| 7582 | 44.90 | 36.60 | 33.11 |
| 7583 | 44.90 | 35.69 | 32.56 |
| 7584 | 44.90 | 39.32 | 32.56 |
| 7585 | 45.72 | 37.51 | 32.56 |
| 7586 | 49.82 | 53.86 | 43.63 |
| 7587 | 54.74 | 48.41 | 42.80 |

---
